# Supplementary material for: Genetic Factors of Renin–Angiotensin System Associated with Major Bleeding for Patients Treated with Direct Oral Anticoagulants
Source: MDPI journal article supplement (doi:10.3390/pharmaceutics14020231), 2022-01-19
Supplement: s1 [file s1]

# Supplementary Materials: Genetic Factors of Renin–Angiotensin System Associated with Major Bleeding for Patients Treated with Direct Oral Anticoagulants

Jeong Yee, Tae-Jin Song, Ha Young Yoon, Junbeom Park and Hye Sun Gwak

**Table S1.** Allele frequencies of single nucleotide polymorphisms (SNPs) analyzed in the study.

| Gene         | SNP        | Allele change | Variant allele frequency of study patients (Koreans) | Variant allele frequency of Asians <sup>a</sup> |
|--------------|------------|---------------|------------------------------------------------------|-------------------------------------------------|
| <i>AGT</i>   | rs7079     | G > T         | 0.10                                                 | 0.12                                            |
| <i>AGT</i>   | rs699      | A > G         | 0.83                                                 | 0.84                                            |
| <i>AGT</i>   | rs11122576 | T > C         | 0.37                                                 | 0.35                                            |
| <i>AGT</i>   | rs5050     | T > G         | 0.22                                                 | 0.17                                            |
| <i>REN</i>   | rs2368564  | C > T         | 0.19                                                 | 0.22                                            |
| <i>REN</i>   | rs12750834 | G > A         | 0.37                                                 | 0.36                                            |
| <i>ACE</i>   | rs1800764  | C > T         | 0.55                                                 | 0.65                                            |
| <i>ACE</i>   | rs4341     | G > C         | 0.57                                                 | 0.69                                            |
| <i>ACE</i>   | rs4353     | A > G         | 0.54                                                 | 0.64                                            |
| <i>AGTR1</i> | rs275651   | T > A         | 0.12                                                 | 0.14                                            |
| <i>AGTR1</i> | rs2640543  | A > G         | 0.86                                                 | 0.80                                            |
| <i>AGTR1</i> | rs5182     | C > T         | 0.78                                                 | 0.67                                            |
| <i>AGTR1</i> | rs5186     | A > C         | 0.04                                                 | 0.07                                            |
| <i>AGTR2</i> | rs1403543  | G > A         | 0.70                                                 | 0.63                                            |

<sup>a</sup>Haploreg v4.1.
